# Supplementary material
Source: PubMed Central journal article supplement (PMC5014622)
Supplement: NIHMS800444-supplement-1.pdf [file NIHMS800444-supplement-1.pdf]

**Supplementary Table 1:** List of mutations identified exclusively in the post-relapse sample, but not the pre-treatment sample, from a melanoma patient who was treated with vemurafinib and relapsed with a time to disease progression of 5 months.

| Chr   | Start    | End      | Ref | Alt | Func.refGene | Gene.refGene | ExonicFunc | AAChange     | genomicSuj1000g2014 | snp138 | Polyphen2_Polyphen2 | LRT_pred | MutationT | MutationAssessor_pred |
|-------|----------|----------|-----|-----|--------------|--------------|------------|--------------|---------------------|--------|---------------------|----------|-----------|-----------------------|
| chrX  | 1.23E+08 | 1.23E+08 | G   | A   | exonic       | STAG2        | nonsynony  | STAG2:NM_    | .                   | .      | D                   | D        | D         | M                     |
| chr15 | 42439924 | 42439924 | T   | G   | exonic       | PLA2G4F      | nonsynony  | PLA2G4F:NM_  | .                   | .      | D                   | D        | D         | M                     |
| chr5  | 1.42E+08 | 1.42E+08 | T   | G   | exonic       | ARHGAP26     | nonsynony  | ARHGAP26:NM_ | .                   | .      | D                   | D        | D         | M                     |
| chr5  | 1.54E+08 | 1.54E+08 | T   | G   | exonic       | GALNT10      | nonsynony  | GALNT10:NM_  | .                   | .      | D                   | D        | D         | H                     |
| chr16 | 720991   | 720991   | A   | C   | exonic       | RHOT2        | nonsynony  | RHOT2:NM_    | .                   | .      | D                   | D        | D         | H                     |
| chr4  | 96124082 | 96124082 | T   | G   | exonic       | UNC5C        | nonsynony  | UNC5C:NM_    | .                   | .      | D                   | D        | D         | M                     |
| chr17 | 32962000 | 32962000 | T   | G   | exonic       | TMEM132E     | nonsynony  | TMEM132E:NM_ | .                   | .      | D                   | D        | D         | M                     |
| chr22 | 20819608 | 20819608 | C   | G   | exonic       | KLHL22       | nonsynony  | KLHL22:NM_   | .                   | .      | D                   | D        | D         | M                     |
| chr15 | 81229165 | 81229165 | A   | C   | exonic       | CEMIP        | nonsynony  | CEMIP:NM_    | .                   | .      | D                   | D        | D         | M                     |
| chr21 | 33074197 | 33074197 | T   | G   | exonic       | SCAF4        | nonsynony  | SCAF4:NM_    | .                   | .      | D                   | D        | D         | M                     |
| chr2  | 2.16E+08 | 2.16E+08 | A   | C   | exonic       | ABCA12       | nonsynony  | ABCA12:NM_   | .                   | .      | D                   | D        | D         | M                     |
| chr6  | 2685596  | 2685596  | T   | A   | exonic       | MYLK4        | nonsynony  | MYLK4:NM_    | .                   | .      | D                   | D        | D         | H                     |
| chr16 | 27460543 | 27460543 | A   | C   | exonic       | IL21R        | nonsynony  | IL21R:NM_    | .                   | .      | D                   | D        | D         | M                     |
| chr1  | 22199894 | 22199894 | T   | G   | exonic       | HSPG2        | nonsynony  | HSPG2:NM_    | .                   | .      | D                   | D        | D         | M                     |
| chr15 | 41029893 | 41029893 | G   | T   | exonic       | RMDN3        | nonsynony  | RMDN3:NM_    | .                   | .      | D                   | D        | D         | M                     |
| chr10 | 73767576 | 73767576 | G   | C   | exonic       | CHST3        | nonsynony  | CHST3:NM_    | .                   | .      | D                   | D        | D         | M                     |
| chr3  | 58145336 | 58145336 | C   | A   | exonic       | FLNB         | nonsynony  | FLNB:NM_     | .                   | .      | D                   | D        | D         | M                     |
| chr10 | 72061204 | 72061204 | T   | G   | exonic       | LRRC20       | nonsynony  | LRRC20:NM_   | .                   | .      | D                   | D        | D         | M                     |
| chrX  | 1.53E+08 | 1.53E+08 | G   | T   | exonic       | AVPR2        | nonsynony  | AVPR2:NM_    | .                   | .      | D                   | D        | D         | H                     |
| chr11 | 1.19E+08 | 1.19E+08 | A   | C   | exonic       | DPAGT1       | nonsynony  | DPAGT1:NM_   | .                   | .      | D                   | D        | D         | M                     |
| chr5  | 1.49E+08 | 1.49E+08 | T   | G   | exonic       | IL17B        | nonsynony  | IL17B:NM_    | .                   | .      | D                   | D        | D         | M                     |
| chr13 | 37012872 | 37012872 | T   | G   | exonic       | CCNA1        | nonsynony  | CCNA1:NM_    | .                   | .      | D                   | D        | D         | H                     |
| chr21 | 27372378 | 27372378 | T   | C   | exonic       | APP          | nonsynony  | APP:NM_      | .                   | .      | D                   | D        | D         | H                     |
| chr9  | 22006176 | 22006176 | T   | G   | exonic       | CDKN2B       | nonsynony  | CDKN2B:NM_   | .                   | .      | D                   | D        | D         | M                     |
| chr14 | 23313599 | 23313599 | T   | G   | exonic       | MMP14        | nonsynony  | MMP14:NM_    | .                   | .      | D                   | D        | D         | M                     |
| chr1  | 1.1E+08  | 1.1E+08  | A   | C   | exonic       | AMPD2        | nonsynony  | AMPD2:NM_    | .                   | .      | D                   | D        | D         | M                     |
| chr1  | 1.51E+08 | 1.51E+08 | C   | G   | exonic       | RFX5         | nonsynony  | RFX5:NM_     | .                   | .      | D                   | D        | D         | M                     |
| chr9  | 1.04E+08 | 1.04E+08 | C   | T   | exonic       | GRIN3A       | nonsynony  | GRIN3A:NM_   | .                   | .      | D                   | D        | D         | M                     |
| chr5  | 1.73E+08 | 1.73E+08 | T   | G   | exonic       | NKX2-5       | nonsynony  | NKX2-5:NM_   | .                   | .      | D                   | D        | D         | M                     |
| chr9  | 96060194 | 96060194 | A   | C   | exonic       | WNK2         | nonsynony  | WNK2:NM_     | .                   | .      | D                   | D        | D         | M                     |
| chr1  | 47283669 | 47283669 | C   | T   | exonic       | CYP4B1       | nonsynony  | CYP4B1:NM_   | .                   | .      | D                   | D        | D         | M                     |
| chr11 | 66033214 | 66033214 | G   | C   | exonic       | KLC2         | nonsynony  | KLC2:NM_     | .                   | .      | D                   | D        | D         | M                     |
| chr17 | 31618750 | 31618750 | T   | G   | exonic       | ASIC2        | nonsynony  | ASIC2:NM_    | .                   | .      | D                   | D        | D         | M                     |
| chr11 | 76796018 | 76796018 | A   | C   | exonic       | CAPN5        | nonsynony  | CAPN5:NM_    | .                   | .      | D                   | D        | D         | H                     |
| chr16 | 20651865 | 20651865 | T   | C   | exonic       | ACSM1        | nonsynony  | ACSM1:NM_    | .                   | .      | D                   | D        | D         | M                     |
| chr2  | 1.56E+08 | 1.56E+08 | A   | C   | exonic       | KCNJ3        | nonsynony  | KCNJ3:NM_    | .                   | .      | D                   | D        | D         | M                     |
| chr12 | 58124709 | 58124709 | C   | T   | exonic       | AGAP2        | nonsynony  | AGAP2:NM_    | .                   | .      | D                   | D        | D         | M                     |
| chr11 | 1.26E+08 | 1.26E+08 | A   | C   | exonic       | DCPS         | nonsynony  | DCPS:NM_     | .                   | .      | D                   | D        | D         | M                     |
| chr16 | 2522806  | 2522806  | A   | C   | exonic       | NTN3         | nonsynony  | NTN3:NM_     | .                   | .      | D                   | D        | D         | H                     |
| chr19 | 18119220 | 18119220 | T   | G   | exonic       | ARRDC2       | nonsynony  | ARRDC2:NM_   | .                   | .      | D                   | D        | D         | H                     |
| chr2  | 85629027 | 85629027 | A   | C   | exonic       | CAPG         | nonsynony  | CAPG:NM_     | .                   | .      | D                   | D        | D         | M                     |
| chr1  | 2.27E+08 | 2.27E+08 | A   | C   | exonic       | PARP1        | nonsynony  | PARP1:NM_    | .                   | .      | D                   | D        | D         | H                     |
| chr1  | 26515317 | 26515317 | T   | G   | exonic       | CNKSR1       | nonsynony  | CNKSR1:NM_   | .                   | .      | D                   | D        | D         | M                     |
| chr9  | 15422971 | 15422971 | T   | G   | exonic       | SNAPC3       | nonsynony  | SNAPC3:NM_   | .                   | .      | D                   | D        | D         | M                     |
| chr20 | 43726317 | 43726317 | C   | T   | exonic       | KCNS1        | nonsynony  | KCNS1:NM_    | .                   | .      | D                   | D        | D         | M                     |
| chr13 | 1.11E+08 | 1.11E+08 | G   | A   | exonic       | COL4A2       | nonsynony  | COL4A2:NM_   | .                   | .      | D                   | D        | D         | H                     |
| chr12 | 1.33E+08 | 1.33E+08 | A   | C   | exonic       | EP400        | nonsynony  | EP400:NM_    | .                   | .      | D                   | D        | D         | M                     |
| chr12 | 51868963 | 51868963 | T   | A   | exonic       | SLC4A8       | nonsynony  | SLC4A8:NM_   | .                   | .      | D                   | D        | D         | M                     |
| chr1  | 1.87E+08 | 1.87E+08 | A   | C   | exonic       | PLA2G4A      | nonsynony  | PLA2G4A:NM_  | .                   | .      | D                   | D        | D         | M                     |
| chr19 | 13136208 | 13136208 | T   | G   | exonic       | NFIX         | nonsynony  | NFIX:NM_     | .                   | .      | D                   | D        | D         | M                     |
| chr11 | 1.2E+08  | 1.2E+08  | A   | G   | exonic       | OAF          | nonsynony  | OAF:NM_      | .                   | .      | D                   | D        | D         | M                     |
| chr2  | 27707975 | 27707975 | A   | C   | exonic       | IFT172       | nonsynony  | IFT172:NM_   | .                   | .      | D                   | D        | D         | M                     |
| chr13 | 52518307 | 52518307 | C   | T   | exonic       | ATP7B        | nonsynony  | ATP7B:NM_    | .                   | .      | D                   | D        | D         | M                     |
| chr22 | 19213138 | 19213138 | C   | A   | exonic       | CLTCL1       | nonsynony  | CLTCL1:NM_   | .                   | .      | D                   | D        | D         | M                     |
| chr6  | 38816525 | 38816525 | T   | G   | exonic       | DNAH8        | nonsynony  | DNAH8:NM_    | .                   | .      | D                   | D        | D         | M                     |
| chrX  | 1.06E+08 | 1.06E+08 | A   | T   | exonic       | TBC1D8B      | nonsynony  | TBC1D8B:NM_  | .                   | .      | D                   | D        | D         | M                     |
| chr8  | 85686850 | 85686850 | C   | A   | exonic       | RALYL        | nonsynony  | RALYL:NM_    | .                   | .      | D                   | D        | D         | M                     |

**Supplementary Table 2:** List of STAG3 mutations found in a study of 45 patients with BRAF Val600-mutant metastatic melanoma who received vemurafenib or dabrafenib monotherapy by Van Allen et al.<sup>4</sup>

| Patient # | Early Resistance | STAG3 Mutation                       |
|-----------|------------------|--------------------------------------|
| 4         | yes              | Pro272Ser (Pre-treatment)            |
| 26        | yes              | Arg508Gln (Pre-treatment)            |
| 40        | no               | Ala107fs (Post-relapse)              |
| 41        | no               | Ala644Val, Ala1082Val (Post-relapse) |
| 45        | no               | Gly129Glu (Post-relapse)             |
| 46        | yes              | Glu1064Lys (Pre-treatment)           |
| 51        | no               | Glu683Lys (Post-relapse)             |
| 60        | yes              | Ser1016fs (Post-relapse)             |
| 63        | no               | Asp30Asn, Asp1221Asn (Post-relapse)  |

**Supplementary Table 3: List of antibodies used in this study.**

| Antigen                        | Manufacturer                 | Clone  | Catalog # | Technique and dilution   |
|--------------------------------|------------------------------|--------|-----------|--------------------------|
| phospho-ERK<br>(Thr202/Tyr204) | Cell signaling<br>Technology |        | 9101      | IHC (1:400); WB (1:3000) |
| ERK                            | Cell signaling<br>Technology | 137F5  | 4695      | WB (1:3000)              |
| MYC                            | Cell signaling<br>Technology | 9B11   | 2276      | WB (1:1000)              |
| phospho-AKT<br>(Thr308)        | Cell signaling<br>Technology | C31E5E | 2965      | WB (1:1000)              |
| AKT                            | Cell signaling<br>Technology | C67E7  | 4691      | WB (1:1000)              |
| phospho-S6<br>(Ser240/Ser244)  | Cell signaling<br>Technology |        | 2215      | WB (1:3000)              |
| S6                             | Cell signaling<br>Technology | 5G10   | 2217      | WB (1:3000)              |
| SMC1                           | Cell signaling<br>Technology | 8E6    | 6892      | WB (1:1000)              |
| EGFR                           | Cell signaling<br>Technology |        | 2232      | WB (1:1000)              |
| GAPDH                          | Cell signaling<br>Technology | 14C10  | 2118      | WB (1:5000)              |
| STAG2                          | Santa Cruz                   | J-12   | SC-81852  | IHC (1:100); WB (1:1000) |
| STAG3                          | Abcam                        |        | ab185109  | IHC (1:200); WB (1:1000) |
| DUSP4                          | Abcam                        |        | ab72593   | WB (1:1000)              |
| DUSP6                          | Abcam                        |        | ab76310   | WB (1:1000)              |
| RAD21                          | Abcam                        |        | ab992     | WB (1:1000)              |
| FLAG                           | Sigma                        | M2     | F3165     | IP (1:500); WB (1:1000)  |
| pan-Ras                        | Thermo<br>Secintific         |        | 16117     | WB (1:1000)              |
| MITF                           | Thermo<br>Secintific         |        | MS-771-P1 | WB (1:200)               |
| STAG1                          | Novus<br>Biologicals         |        | NB100-298 | WB (1:1000)              |
| COT                            | Biorbyt                      |        | orb127540 | WB (1:250)               |
| CTCF                           | Diagenode                    |        | C15410210 | ChIP (1:500)             |

# Supplementary Figure 1

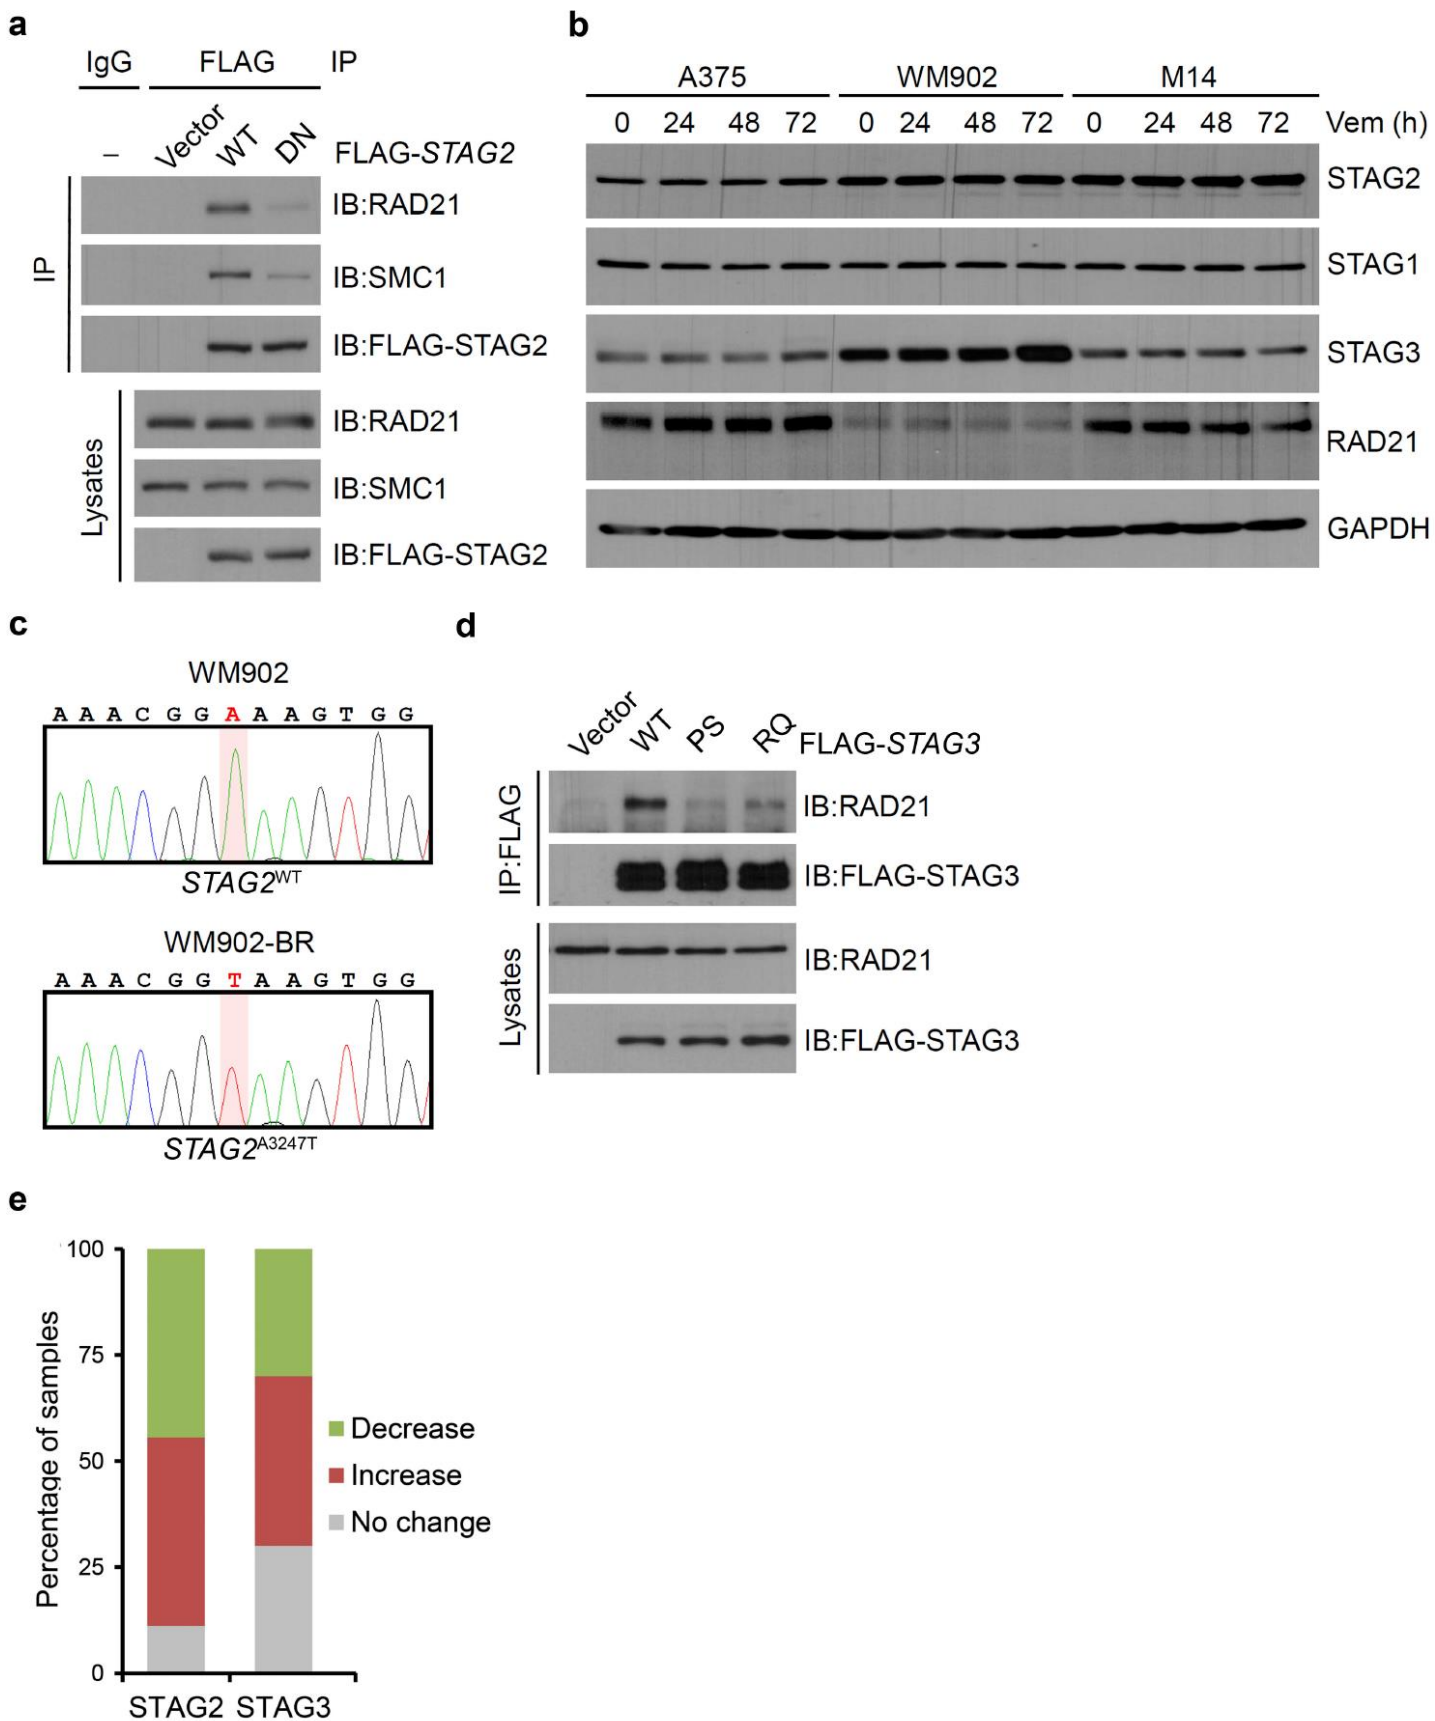

**Supplementary Figure 1: Identification and characterization of STAG2 and STAG3 mutations in melanoma.** (a) HEK293 cells were transfected with FLAG-tagged wild-type STAG2 (WT) or Asp193Asn (DN) mutant. Cell lysates were immunoprecipiated with anti-FLAG antibodies, followed by western blotting. Experiment was performed 3 times. (b) A375, WM902 or M14 Cells were incubated in the presence of 0.3  $\mu$ M vemurafenib. Cell lysates were collected at indicated times and analyzed by western blotting. Experiment was performed 3 times. (c) Detection of a *STAG2* mutation in WM902-BR cells by Sanger sequencing. (d) HEK293 cells were transfected with FLAG-tagged wild-type STAG3 (WT), Pro272Ser (PS) or Arg508Gln (RQ) mutants. Cell lysates were immunoprecipiated with anti-FLAG antibodies, followed by western blotting. Experiment was performed 3 times. (e) Percentages of post-relapse samples from a total of nine patients treated with BRAFi monotherapy or BRAFi and MEKi combination therapy that showed changes of STAG2 or STAG3 expression, compared to their paired pre-treatment samples, in IHC analyses.

# Supplementary Figure 2

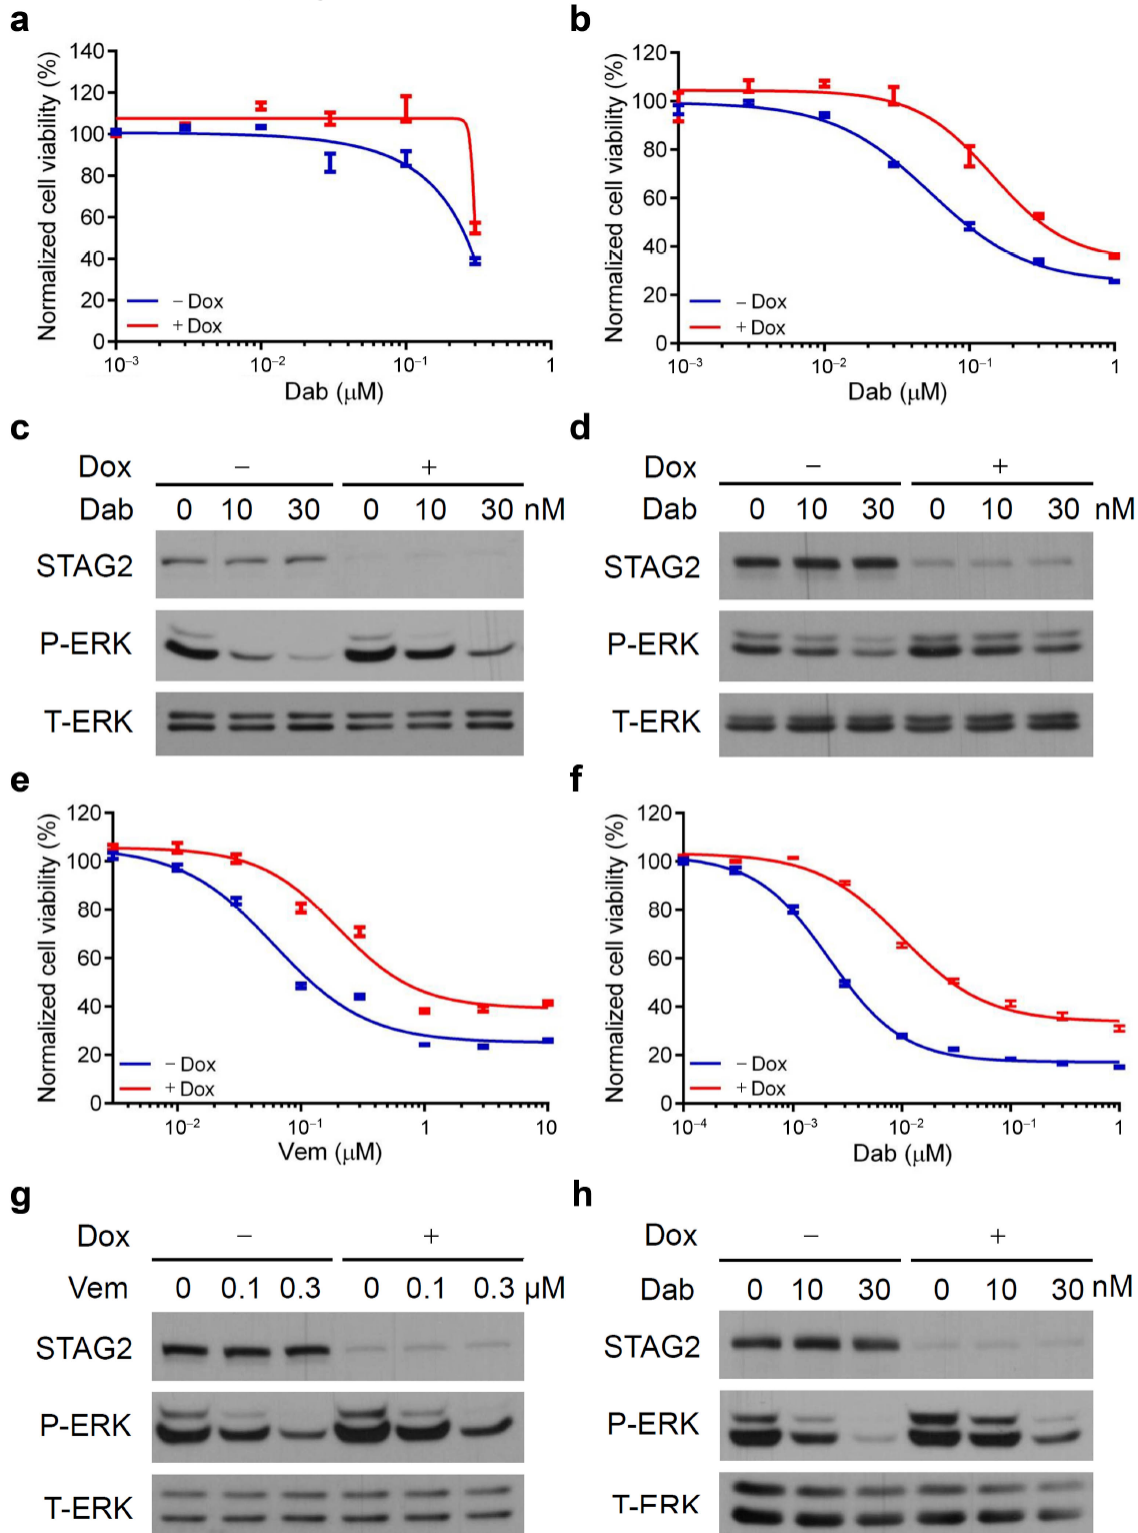

## Supplementary Figure 2

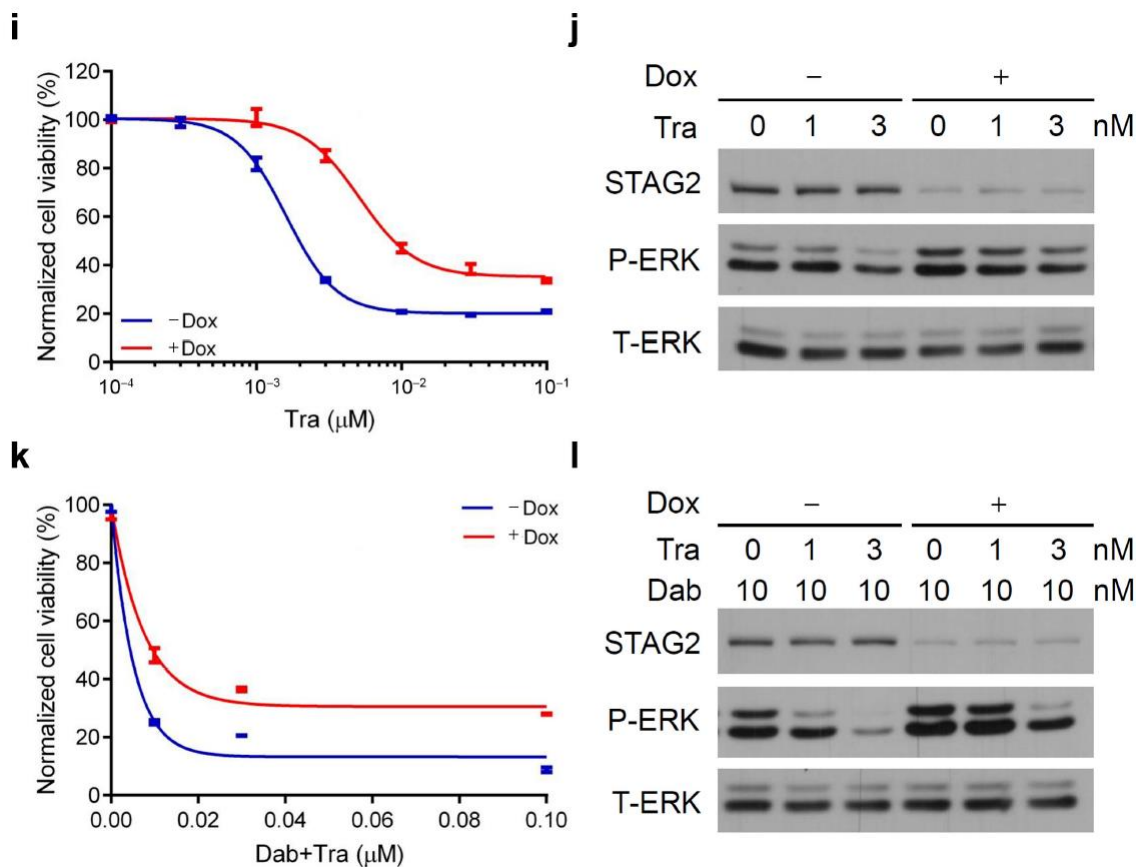

**Supplementary Figure 2: Knockdown of STAG2 or STAG3 decreases BRAFi sensitivities in BRAF mutant melanoma cells.** (a,b) Viability of SKMEL28 (a) or M14 (b) cells after treatment with varying concentrations of dabrafenib for 3 d. Experiment was performed 3 times. Data are mean  $\pm$  s.e.m. (c,d) SKMEL28 (c) or M14 (d) cells expressing STAG2 inducible shRNA pTRIPZ-shSTAG2#60 were treated with dabrafenib for 2 h. Cell lysates were used for western blotting with indicated antibodies. Experiment was performed 3 times. (e,f) Viability of A375 cells after treatment with varying concentrations of vemurafenib (e) or dabrafenib (f) for 3 d. Experiment was performed 3 times. Data are mean  $\pm$  s.e.m. (g,h) A375 cells cells expressing STAG2 inducible shRNA pTRIPZ-shSTAG2#60 were treated with vemurafenib (g) or or dabrafenib (h) for 2 h. Cell lysates were used for western blotting with indicated antibodies. Experiment was performed 3 times. (i) Viability of A375 cells after treatment with varying concentrations of trametinib for 3 d. Experiment was performed 3 times. Data are mean  $\pm$  s.e.m. (j) A375 cells expressing STAG2 inducible shRNA pTRIPZ-shSTAG2#60 were treated with trametinib for 2 h. Cell lysates were used for western blotting with indicated antibodies. Experiment was performed 3 times. (k) Viability of A375 cells after treatment of varying concentrations of dabrafenib and trametinib together at a ratio of 10:1 for 3 d. Experiment was performed 3 times. Data are mean  $\pm$  s.e.m. (l) A375 cells expressing STAG2 inducible shRNA pTRIPZ-shSTAG2#60 were treated with dabrafenib and trametinib as indicated for 2 h. Cell lysates were used for western blotting with indicated antibodies. Experiment was performed 3 times.

# Supplementary Figure 3

**a**

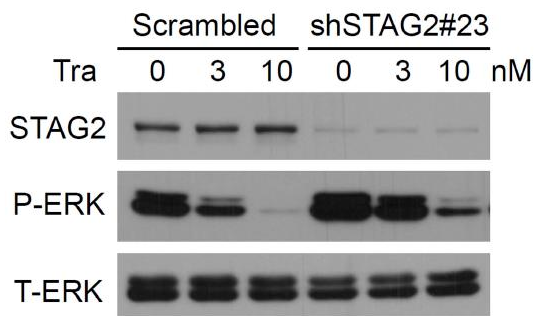

**b**

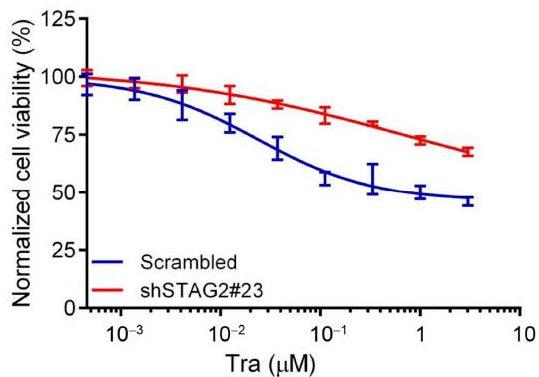

**c**

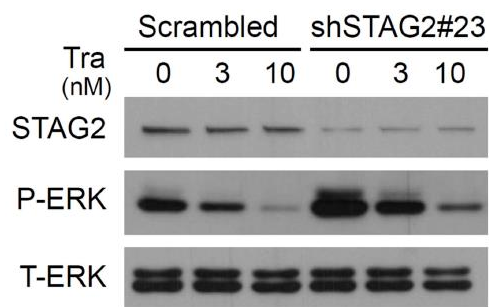

**d**

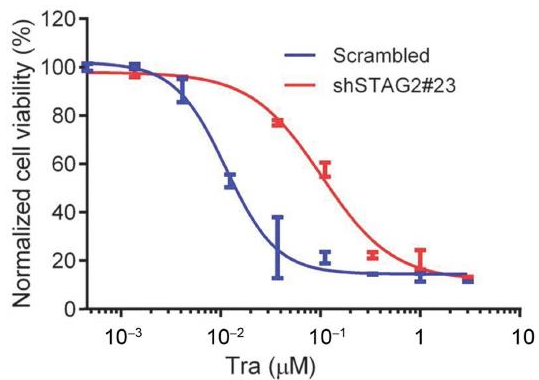

**e**

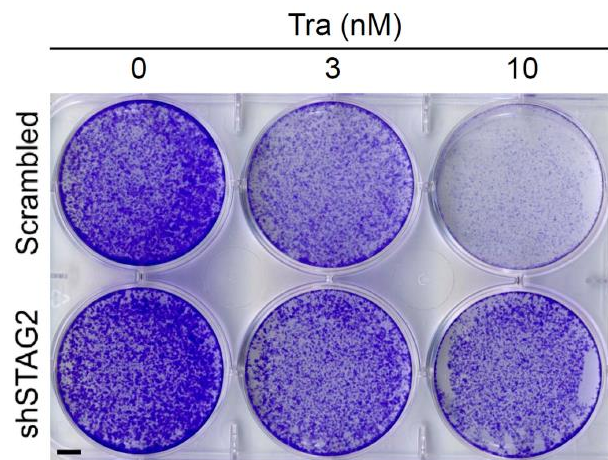

**f**

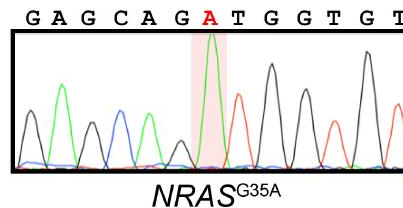



**Supplementary Figure 3: Knockdown of STAG2 decreases MEKi sensitivities in NRAS mutant melanoma cells.** (a) SKMEL103 cells expressing STAG2 shRNA#23 or scrambled control were treated with trametinib for 2 h. Cell lysates were used for western blotting with indicated antibodies. Experiment was performed 3 times. (b) Viability of SKMEL103 cells after treatment of varying concentrations of trametinib for 3 d. Experiment was performed 3 times. Data are mean  $\pm$  s.e.m. (c) 501MEL cells expressing STAG2 shRNA#23 or scrambled control were treated with trametinib for 2 h. Cell lysates were used for western blotting with indicated antibodies. Experiment was performed 3 times. (d) Viability of 501MEL cells after treatment of varying concentrations of trametinib for 3 d. Experiment was performed 3 times. Data are mean  $\pm$  s.e.m. (e) Viability of 501MEL cells expressing STAG2 shRNA#23 or scrambled control were seeded at  $3 \times 10^4$  per well in 6-well plates and treated with trametinib as indicated in clonogenic growth assays. Experiment was performed 3 times. Scale bar: 5 mm. (f) Conformation of *NRAS* mutation in 501MEL cells by Sanger sequencing.

## Supplementary Figure 4

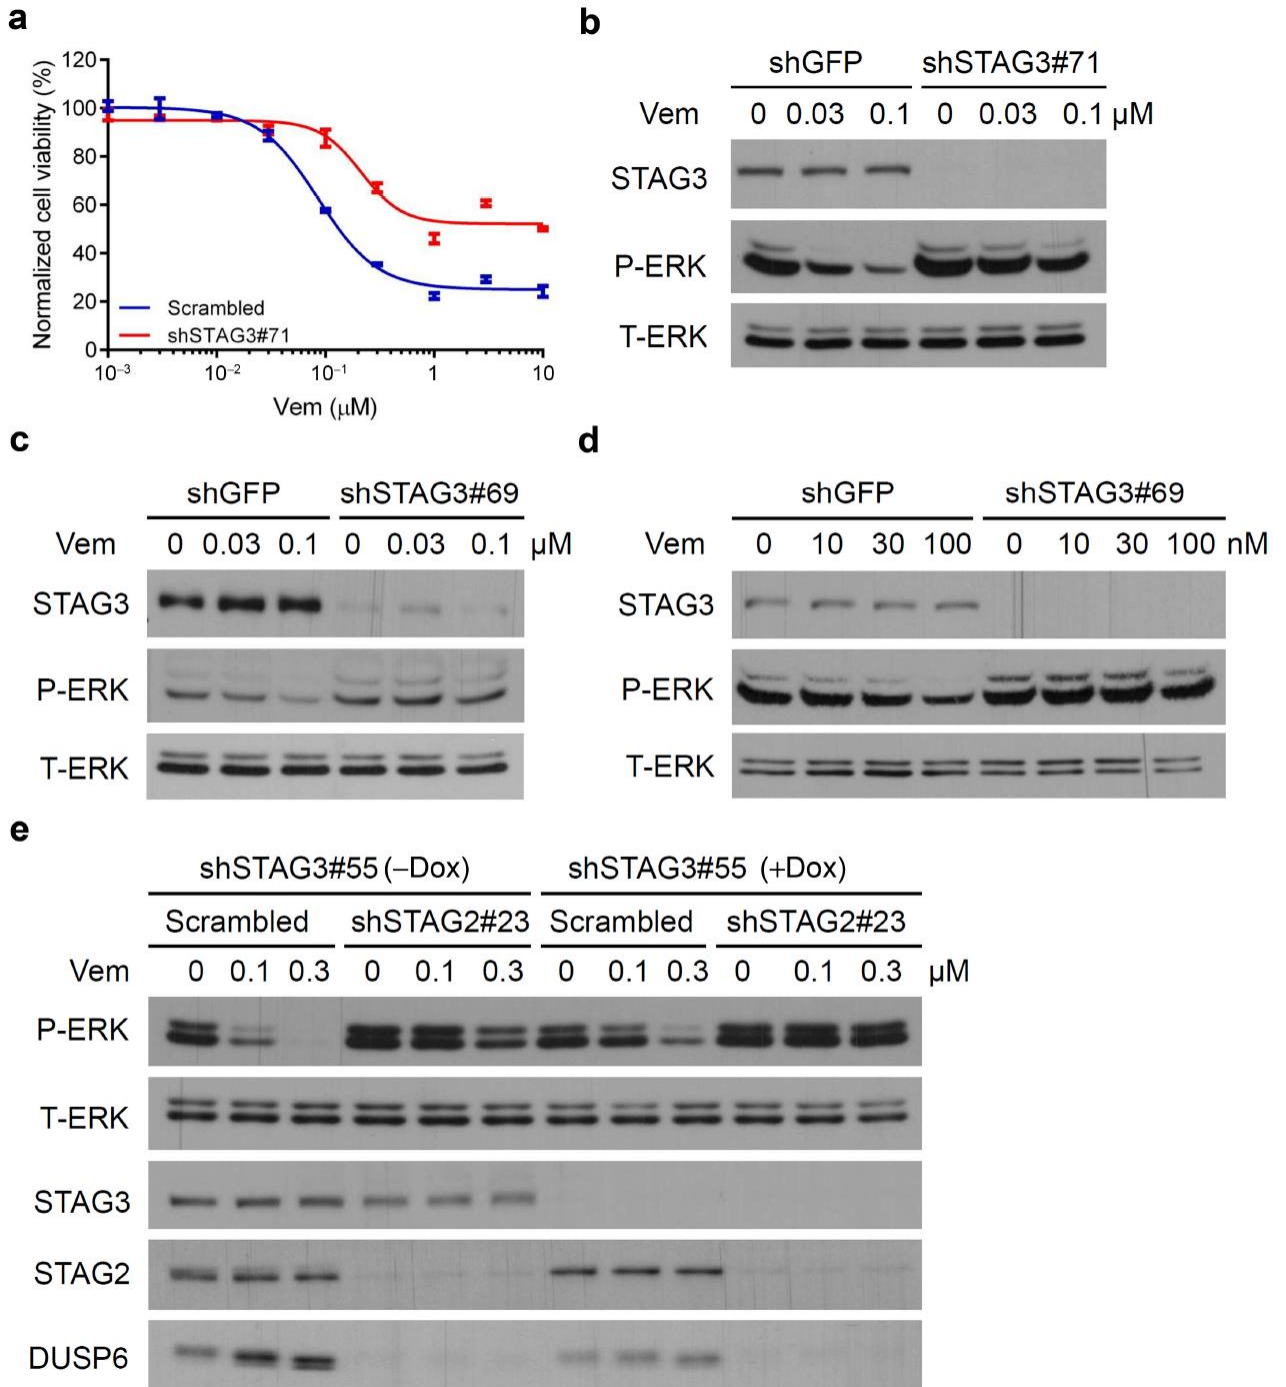

**Supplementary Figure 4: Knockdown of STAG3 decreases BRAFi sensitivities in BRAF mutant melanoma cells.** (a) Viability of M14 cells after treatment of varying concentrations of vemurafenib for 3 d. Experiment was performed 3 times. Data are mean  $\pm$  s.e.m. (b) M14 cells expressing STAG3 shRNA#71 or scrambled control were treated with vemurafenib for 2 h. Cell lysates were used for western blotting with indicated antibodies. Experiment was performed 3 times. (c,d) A375 (c) or SKMEL28 (d) cells expressing STAG3 shRNA#69 or scrambled control were treated with vemurafenib for 2 h. Cell lysates were used for western blotting with indicated antibodies. Experiment was performed 3 times. (e) A375 cells expressing STAG3 inducible shRNA pTRIPZ-shSTAG3#55 were infected with STAG2 shRNA#23 or scrambled control. Cells were cultured in the presence or absence of doxycycline for 5 d. and treated with various concentrations of vemurafenib for 2 h before lysates were used for western blotting with indicated antibodies. Experiment was performed 3 times.

# Supplementary Figure 5

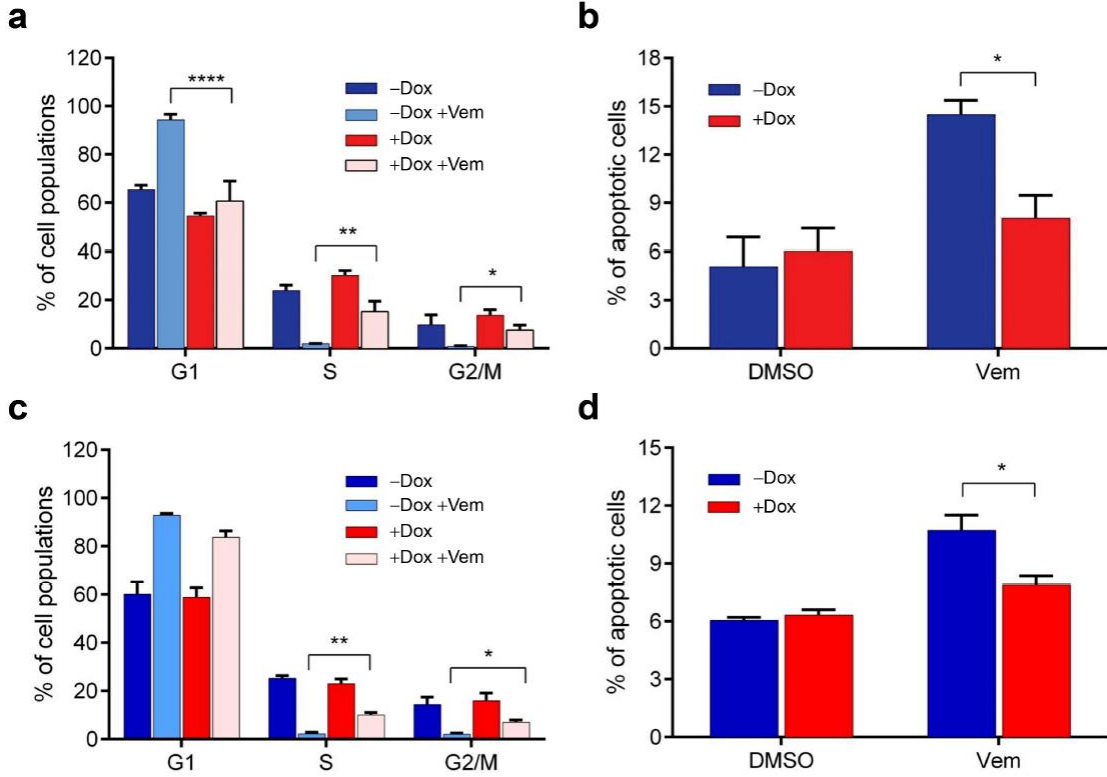

**Supplementary Figure 5: Loss of STAG3 impairs the changes in cell cycle progression and reduced the percentages of annexin V-positive apoptotic cells in response to vemurafenib treatment.** (a,b) A375 cells expressing STAG2 inducible shRNA pTRIPZ-shSTAG2#60 were cultured in the presence or absence of doxycycline for 5 d. Cells were treated with or without 1  $\mu$ M vemurafenib for 72 h before cell cycle (a) and apoptosis (b) analyses were performed. Experiment was performed 3 times. Data are mean  $\pm$  s.e.m. The *P* values were determined using two tailed Student's *t*-test, \* *P* < 0.05; \*\* *P* < 0.01; \*\*\*\* *P* < 0.0001. The data variance is similar between groups. (c,d) A375 cells expressing STAG3 inducible shRNA pTRIPZ-shSTAG3#55 were cultured in the presence or absence of doxycycline for 5 d. Cells were treated with or without 1  $\mu$ M vemurafenib for 72 h before cell cycle (c) and apoptosis (d) analyses were performed. Experiment was performed 3 times. Data are mean  $\pm$  s.e.m. The *P* values were determined using two-tailed Student's *t*-test, \* *P* < 0.05; \*\* *P* < 0.01. The data variance is similar between groups.



**Supplementary Figure 6: Ectopic expression of STAG2 or STAG3 increases sensitivities to BRAFi in melanoma cells.** (a) WM902-BR cells stably expressing FLAG-tagged wild-type STAG3 or control vector were treated with 3  $\mu$ M vemurafenib for 2 h. Cell lysates were used for western blotting with indicated antibodies. Experiment was performed 3 times. (b) WM902-BR stable expressing of FLAG-tagged wild-type STAG3 or control vector were used in soft agar assays in the presence or absence of 3  $\mu$ M vemurafenib. Experiment was performed 3 times. Scale bar: 5 mm (c) WM983-BR cells stably expressing FLAG-tagged wild-type STAG2, STAG3 or vector control were treated with 1  $\mu$ M vemurafenib for 2 h. Cell lysates were used for western blotting with indicated antibodies. Experiment was performed 3 times. (d) LOX-IVMI cells stably expressing FLAG-tagged wild-type STAG2 (WT), Lys1083\* (K\*) or Asp193Asn (DN) mutants were treated with 3  $\mu$ M vemurafenib for 2 h. Cell lysates were used for western blotting with indicated antibodies. Experiment was performed 3 times. (e) HEK293 cells were transfected with MYC-tagged BRAF Val600Glu together with FLAG-tagged wild-type STAG2 (WT), Lys1083\* (K\*) or Asp193Asn (DN) mutants. Cells were treated with 10  $\mu$ M vemurafenib for 2 h. Cell lysates were used for western blotting with indicated antibodies. Experiment was performed 3 times. (f) HEK293 cells were transfected with MYC-tagged BRAF Val600Glu together with FLAG-tagged wild-type STAG3 (WT), Pro272Ser (PS) or Arg508Gln (RQ) mutants. Cells were treated with 10  $\mu$ M vemurafenib for 2 h. Cell lysates were used for western blotting with indicated antibodies. Experiment was performed 3 times. (g) M14 cells stably expressing FLAG-tagged wild-type STAG2, STAG3 or control vector were treated with 30 nM vemurafenib for 2 h. Cell lysates were used for western blotting with indicated antibodies. Experiment was performed 3 times.

## Supplementary Figure 7

**a**

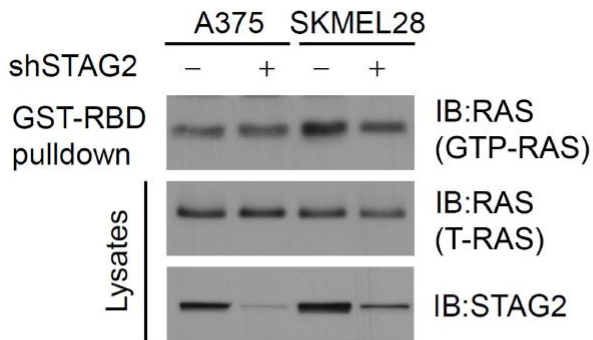

**b**

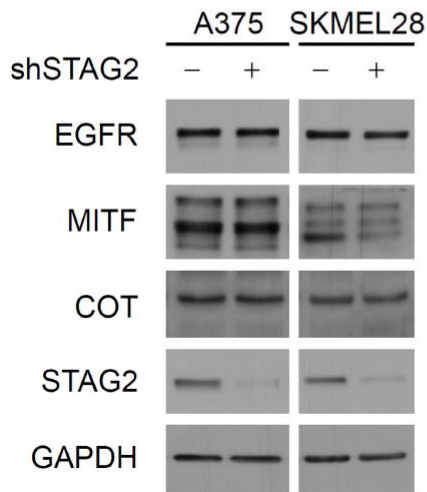

**c**

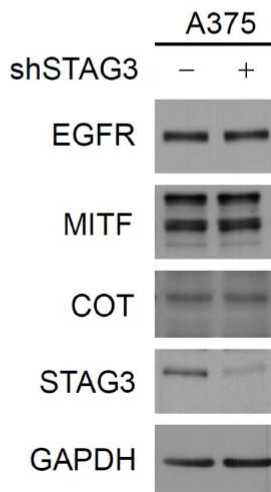

**Supplementary Figure 7: Loss of STAG2 does not affect Ras activity or expression of EGFR, MITF or COT in melanoma cells.** (a) A375 and SKMEL28 cells were stably infected with lentivirus expressing STAG2 shRNA#23 or scrambled control. RAS activation was assessed by pull-down assays with GST-RAF1-RAS binding domain (RBD), followed by western blotting with indicated antibodies. Experiment was performed 3 times. (b) A375 or SKMEL28 cells expressing inducible STAG2 shRNA pTRIPZ-shSTAG2#60 were cultured in the presence or absence of doxycycline for 5 d before lysates were used for western blotting with indicated antibodies. Experiment was performed 3 times. (c) A375 cells expressing STAG3 shRNA#96 or scrambled control were used for western blotting with indicated antibodies. Experiment was performed 3 times.

## Supplementary Figure 8

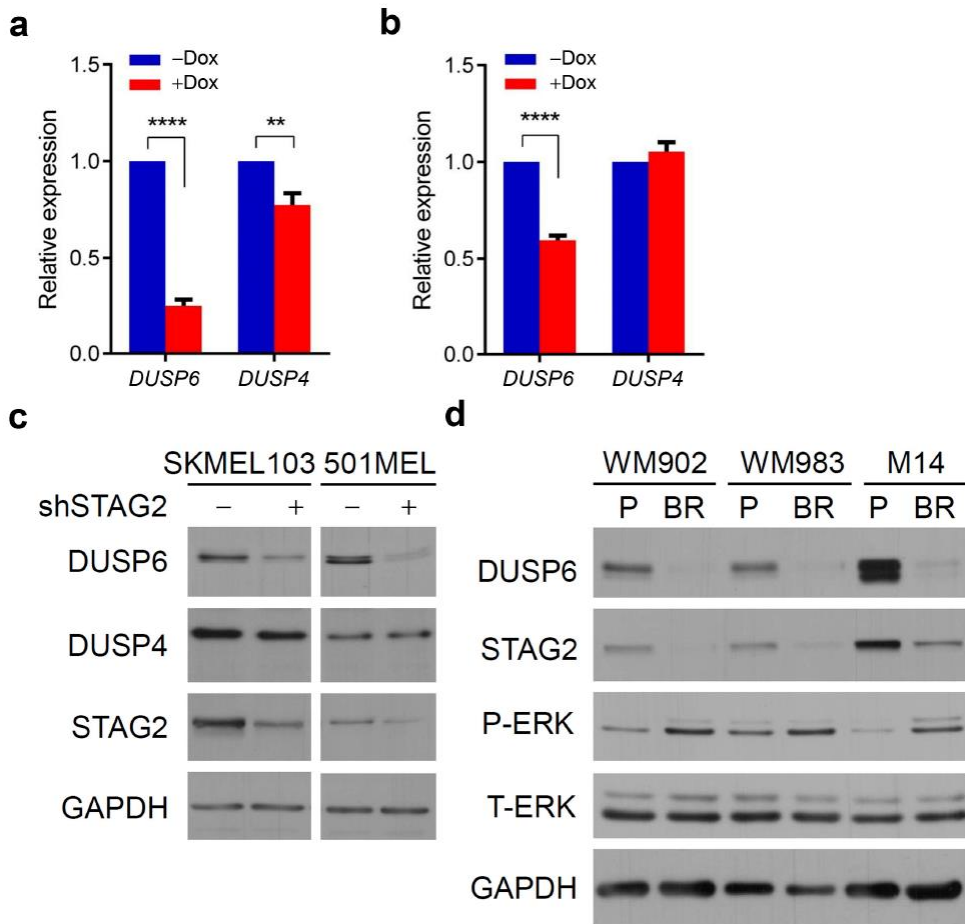

### Supplementary Figure 8: STAG2 regulates expression of DUSP6 in melanoma cells.

(a,b) Total RNA from A375 (a) and M14 (b) cells expressing STAG2 inducible shRNA pTRIPZ-shSTAG2#60 were isolated, reverse transcribed, and expression levels of *DUSP4* and *DUSP6* were analyzed by qPCR. Levels of mRNA were calculated relative to the absence of doxycycline control, and housekeeping *GAPDH* gene was used as the reference.  $n = 3$  biological replicates. Data are mean  $\pm$  s.e.m. The  $P$  values were determined using two-tailed Student's  $t$ -test,  $** P < 0.01$ ,  $**** P < 0.0001$ . The data variance is similar between groups. (c) Lysates from SKMEL103 or 501MEL cells expressing STAG2 shRNA#23 or scrambled control were used for western blotting with indicated antibodies. Experiment was performed 3 times. (d) Expression of DUSP6 protein in BRAFi-resistant cell lines (BR) and their parental BRAFi-sensitive counterparts (P). Lysates were used for western blotting with indicated antibodies. Experiment was performed 3 times.



## Supplementary Figure 9

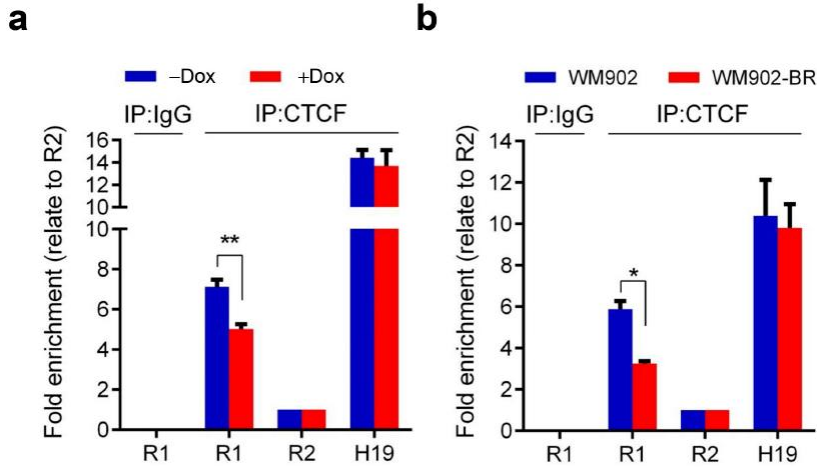

### Supplementary Figure 9: STAG2 regulates the binding of CTCF to the *DUSP6* locus.

(a) M14 cells expressing inducible STAG2 shRNA pTRIPZ-shSTAG2#60 were cultured in the presence or absence of doxycycline for 5 d before ChIP-qPCR assays were performed. Chromatins were immunoprecipitated using CTCF antibody or rabbit IgG. (b) Chromatins of WM902 and WM902-BR were immunoprecipitated using CTCF antibody or rabbit IgG. IP-ed chromatins were examined using qPCR with primers for R1 and R2 regions of *DUSP6* and *H19*. Results are expressed as fold enrichment relative to the non-specific region (R2).  $n = 3$  biological replicates. Data are mean  $\pm$  s.e.m. The  $P$  values were determined using two-tailed Student's  $t$ -test. \*  $P < 0.05$ ; \*\*  $P < 0.01$ . The data variance is similar between groups.

# Supplementary Figure 10

**a**

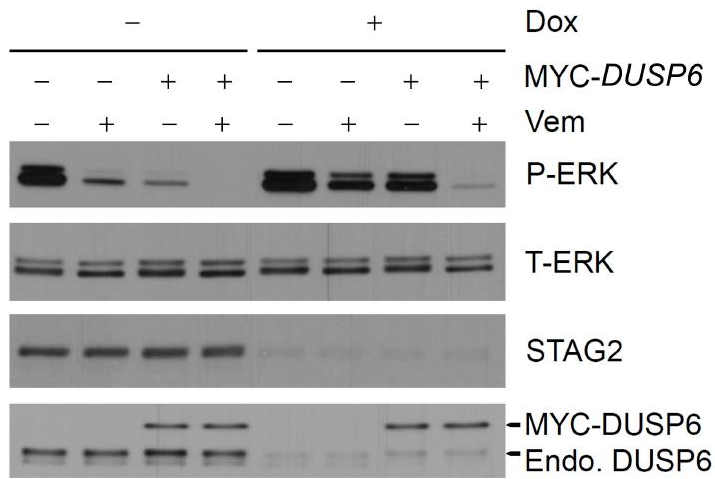

**b**

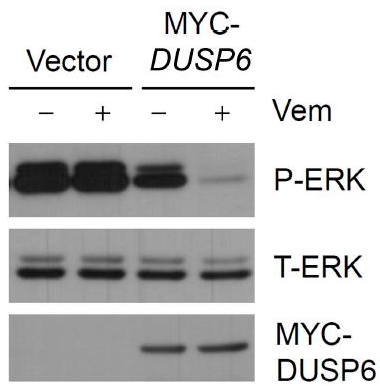

**c**

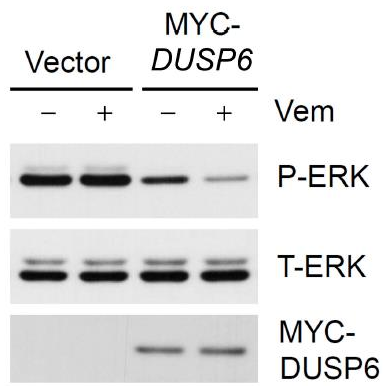

**d**

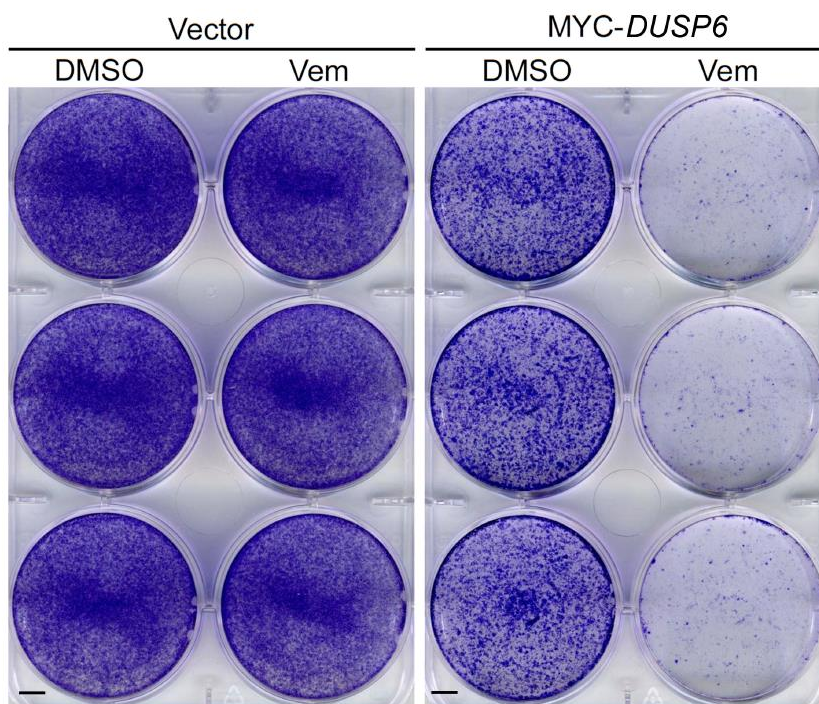

## Supplementary Figure 10

e

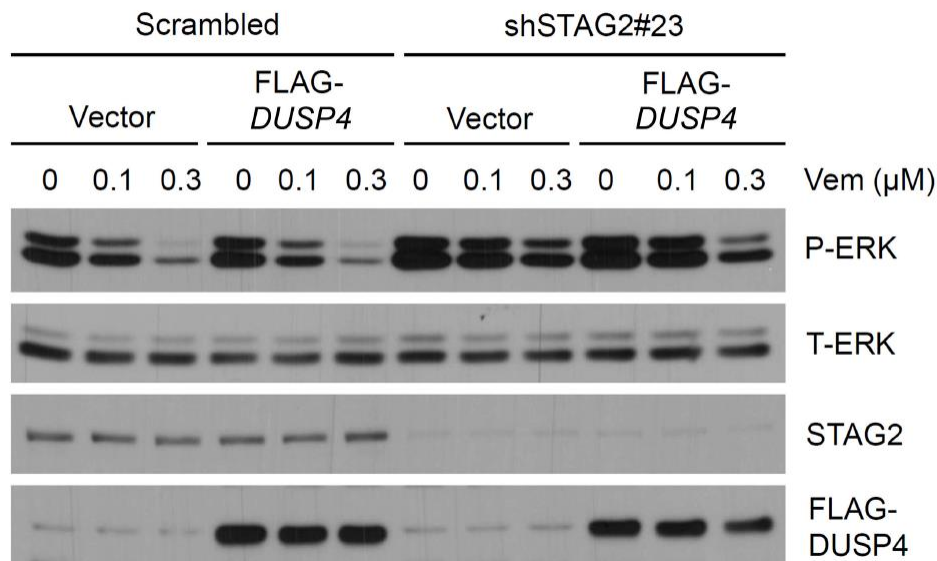

**Supplementary Figure 10: STAG2 regulates ERK activity through controlling expression of DUSP6.** (a) M14 cells expressing STAG2 inducible shRNA pTRIPZ-shSTAG2#60 were infected with lentivirus expressing MYC-DUSP6 or control vector. Cells were cultured in the presence or absence of doxycycline for 5 d and treated with 0.3  $\mu$ M vemurafenib for 2 h before lysates were used for western blotting with indicated antibodies. Experiment was performed 3 times. (b,c) WM902-BR cells (b) and WM983-BR (c) expressing MYC-tagged DUSP6 or vector control were treated with 10  $\mu$ M vemurafenib for 2 h. Cell lysates were used for western blotting with indicated antibodies. Experiment was performed 3 times. (d) WM902-BR cells expressing MYC-tagged DUSP6 or vector control were seeded at  $3 \times 10^4$  per well in 6-well plates and treated with in the presence or absence of 1  $\mu$ M vemurafenib as indicated in clonogenic growth assays. Experiment was performed 3 times. Scale bar: 5 mm (e) A375 cells expressing STAG2 shRNA#23 or scrambled control were infected with lentivirus expressing Flag-DUSP4 or control vector. Cells were treated with vemurafenib for 2 h before lysates were used for western blotting with indicated antibodies. Experiment was performed 3 times..

## Supplementary Figure 11

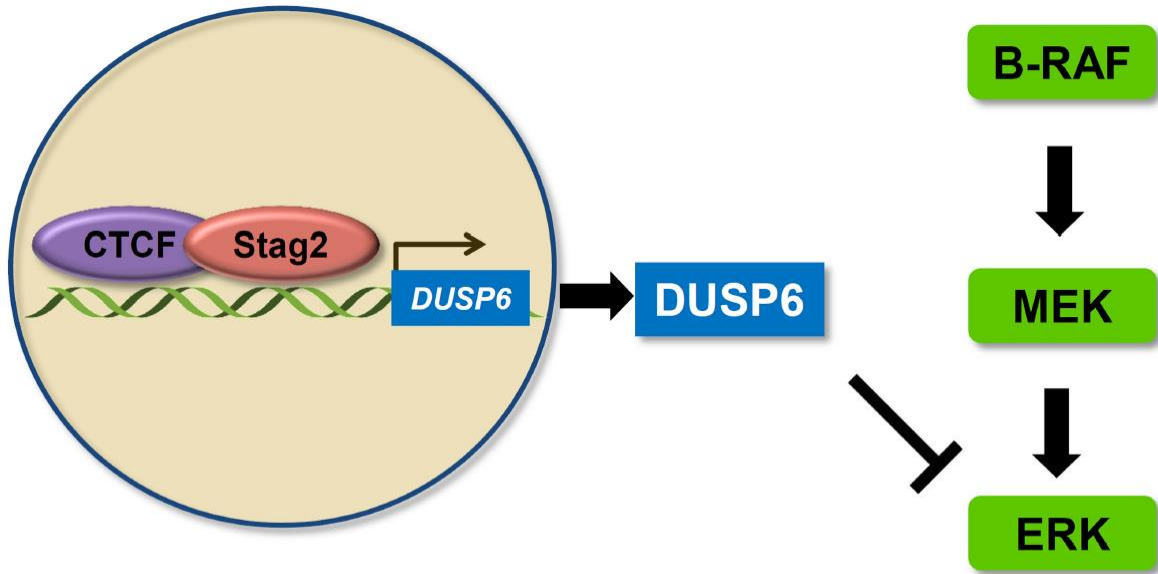

**Supplementary Figure 11:** Schematic model for regulation of BRAF-MEK-ERK signaling pathway by STAG2.
